# Supplementary material
Source: publisher figshare collection journal article supplement (https://tandf.figshare.com/ndownloader/files/10728673)
Supplement: Supplementary file 1 [file 10728673]

Experimental and Theoretical Investigation of Antioxidant Activity and

Capacities of Thiosemicarbazones Based on Isatin Derivatives

Temelkan Bakır a)*, Hakan Sezgin SAYINER b),Fatma Kandemirli c)

a)Kastamonu University, Faculty of Science and Letters, Department of Chemistry,Kastamonu, Turkey

b)Infectious Diseases, Medicine Department, Adiyaman University, Adıyaman, Turkey

c)Kastamonu University, Faculty of Engineering, Department of biomedical engineering, Kastamonu, Turkey

Email: temelkan@kastamonu.edu.tr

**Supplemental Materials**

The optimized HOMO, LUMO, and electron density of H25MI3PT and H25MI3ClPT for neutral, anionic, cationic, and radical forms are given in Fig. S 1. The HOMO mainly consists of an isatin group and a S atom for H25MI3PT, but for H25MI3ClPT, the HOMO is distributed over the whole of the molecule. The LUMO mainly consists of an isatin group for the neutral form. The optimized HOMO, LUMO, and electron density of DPPH for neutral, radical, anionic, and cationic forms are shown in Fig. S2.

**
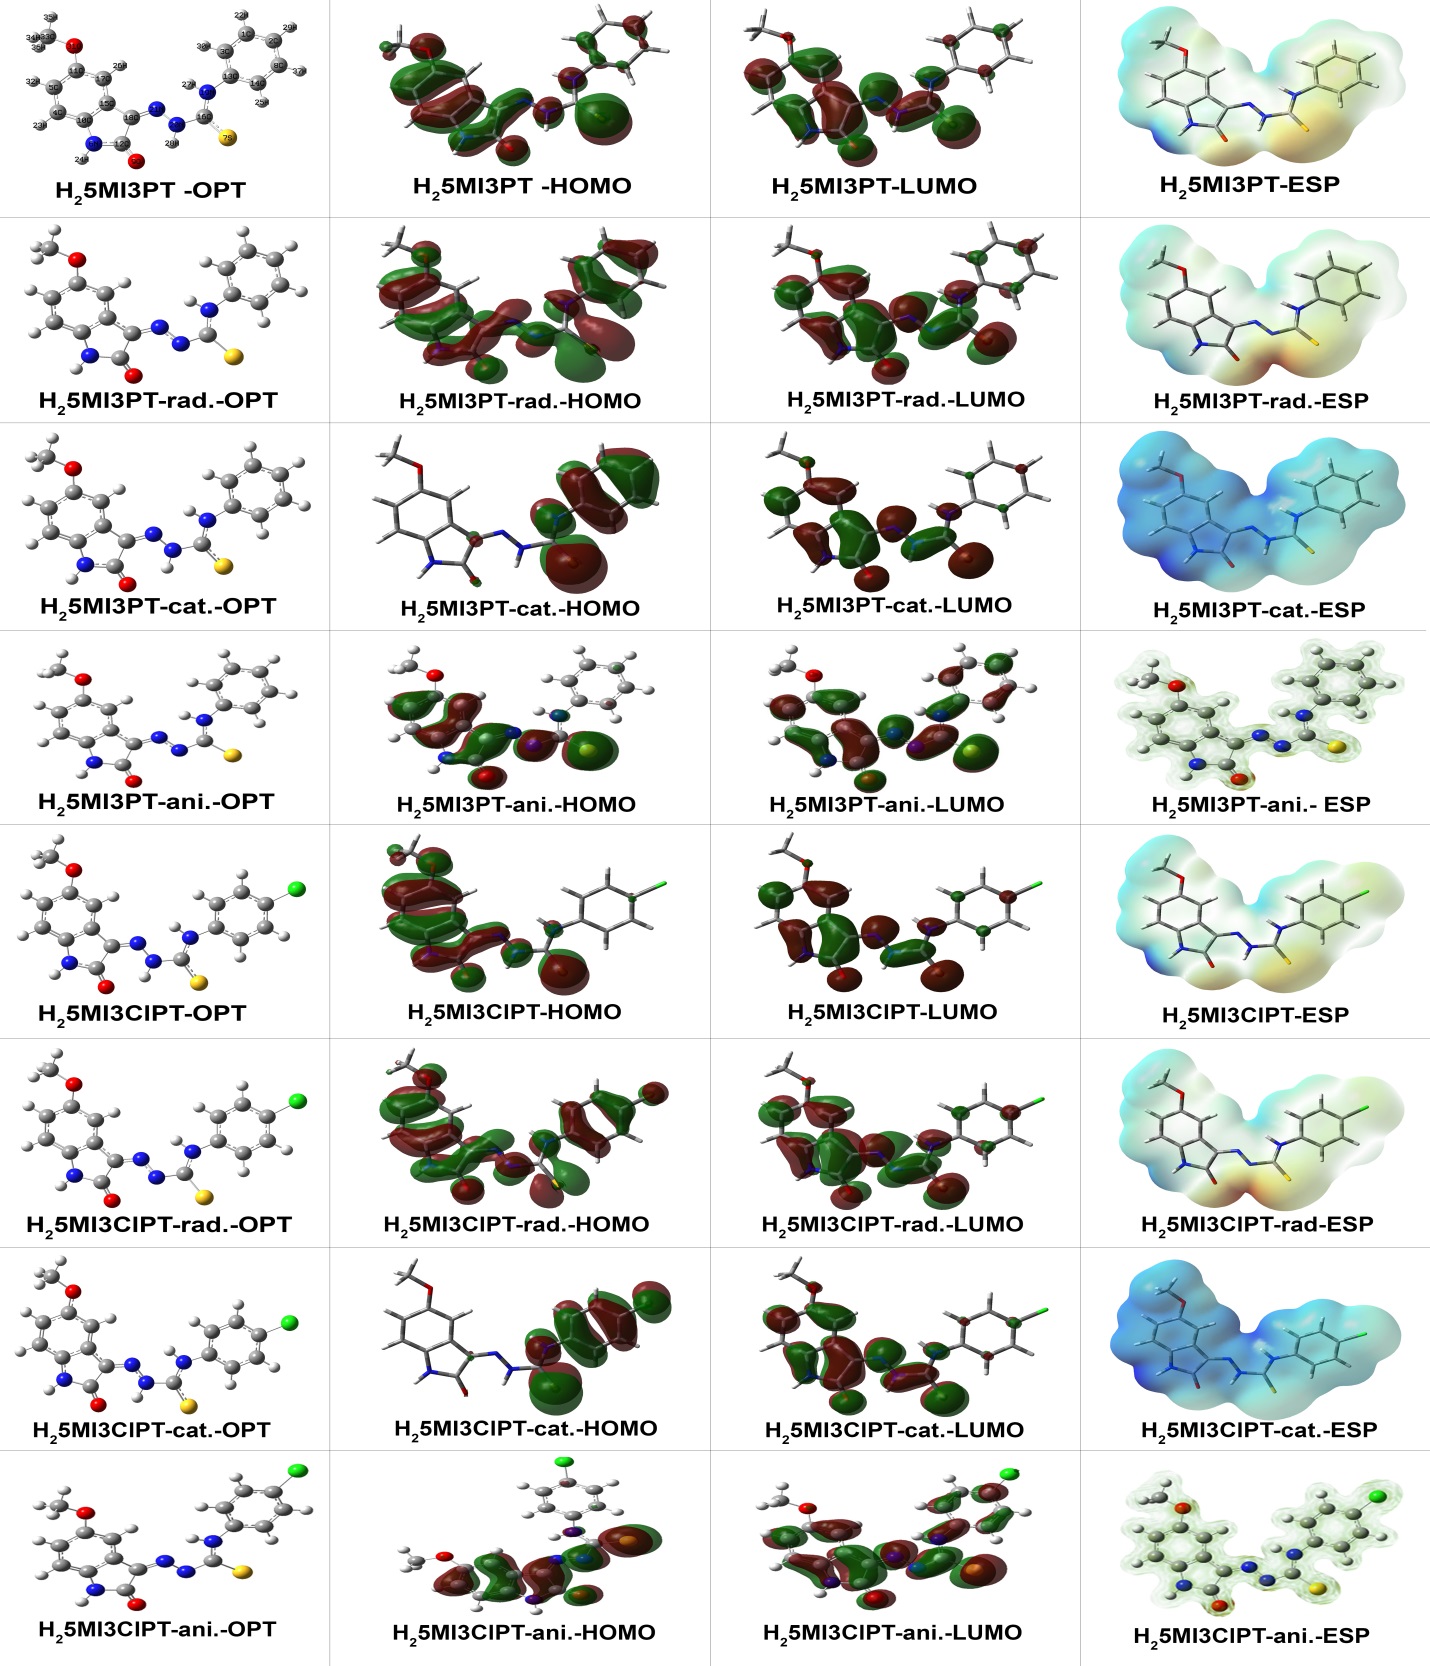
**

**Figure S 1:** Optimized form, HOMO, LUMO and Electron density of H25MI3ClPT and H25MI3PT molecules for neutral radical anionic and cationic form


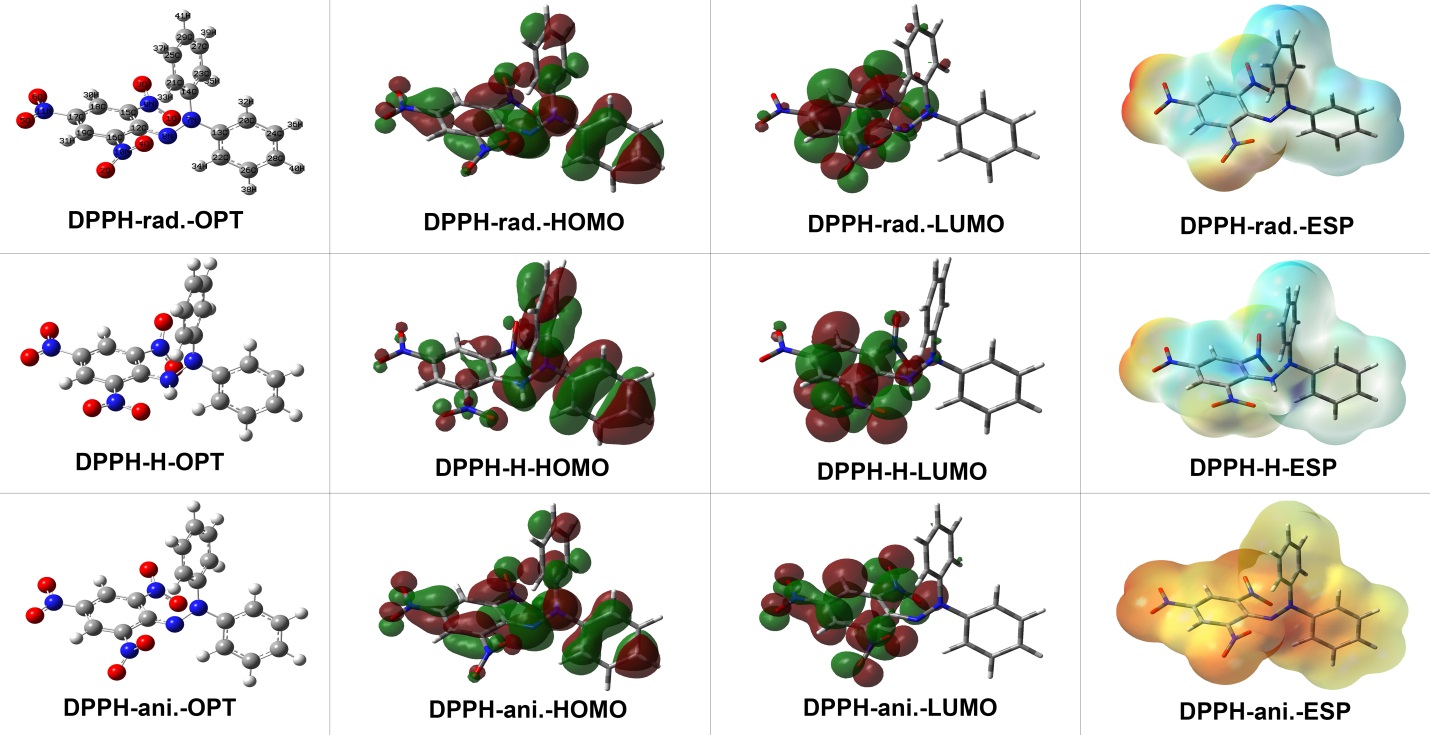


**Figure S 2:** Optimized form, HOMO, LUMO and Electron density of DPPH molecule for neutral radical anionic and cationic form
